# Supplementary material
Source: PubMed Central journal article supplement (PMC3754744)
Supplement: JB.00470-13_zjb999092787so1.pdf [file JB.00470-13_zjb999092787so1.pdf]

## Supplemental Material

**TABLE S1** Genes showing altered expression in strain *G. oxydans*  $\Delta upp\Delta cyoBACD$  compared to the reference strain *G. oxydans*  $\Delta upp$ . Cells were cultivated in baffled shake flasks with mannitol as carbon source and harvested at an OD<sub>600</sub> of 1.5. RNA extraction, reverse transcription and cDNA labeling and DNA microarray analysis were performed as described previously (Hanke et al. 2012, J. Biotechnol. 157: 359-372). Genes showing an mRNA ratio ( $\Delta upp \Delta cyoBACD$  versus  $\Delta upp$ )  $\geq 2$  and  $\leq 0.5$  and a p-value  $\leq 0.05$  are listed according to their locus tag number. The ratios represent mean values of three independent experiments.

| Locus tag                                               | Annotation                                                        | Gene name     | mRNA ratio | p value  |
|---------------------------------------------------------|-------------------------------------------------------------------|---------------|------------|----------|
| <b>102 genes with an mRNA ratio <math>\geq 2</math></b> |                                                                   |               |            |          |
| GOX0057                                                 | Protein with GGDEF and EAL domain                                 |               | 2.11       | 1.36E-02 |
| GOX0069                                                 | Hypothetical membrane-spanning protein                            |               | 2.13       | 1.03E-02 |
| GOX0135                                                 | Transcriptional regulator, Ros/MucR family                        |               | 2.30       | 1.99E-04 |
| GOX0278                                                 | Cytochrome <i>bd</i> ubiquinol oxidase subunit I                  | <i>cydA</i>   | 5.43       | 9.28E-03 |
| GOX0279                                                 | Cytochrome <i>bd</i> ubiquinol oxidase subunit II                 | <i>cydB</i>   | 3.61       | 2.01E-02 |
| GOX0290                                                 | Putative oxidoreductase                                           |               | 2.43       | 4.35E-02 |
| GOX0291                                                 | Putative ferredoxin subunit of ring-hydroxylating dioxygenase     | <i>hca</i>    | 3.69       | 9.29E-03 |
| GOX0311                                                 | Transhydrogenase, subunit $\alpha 2$                              | <i>pntA2</i>  | 2.46       | 6.48E-03 |
| GOX0312                                                 | Transhydrogenase, subunit b                                       | <i>pntB</i>   | 2.19       | 1.36E-03 |
| GOX0313                                                 | Alcohol:NAD <sup>+</sup> oxidoreductase                           |               | 2.22       | 1.20E-02 |
| GOX0433                                                 | Hypothetical protein                                              |               | 4.81       | 1.16E-02 |
| GOX0442                                                 | Hypothetical protein                                              |               | 2.67       | 3.50E-02 |
| GOX0475                                                 | Hypothetical protein                                              |               | 2.36       | 2.13E-02 |
| GOX0498                                                 | Hypothetical protein                                              |               | 2.38       | 1.52E-02 |
| GOX0502                                                 | Putative oxidoreductase                                           |               | 2.05       | 3.69E-02 |
| GOX0503                                                 | Hypothetical protein                                              |               | 2.23       | 4.46E-02 |
| GOX0519                                                 | Hypothetical outer membrane protein                               |               | 2.35       | 2.05E-02 |
| GOX0532                                                 | ExbB protein                                                      | <i>exbB</i>   | 3.40       | 2.46E-02 |
| GOX0545                                                 | Putative outer membrane receptor for iron transport               |               | 2.72       | 9.08E-04 |
| GOX0566                                                 | Ubiquinol-cytochrome <i>c</i> oxidoreductase, cytochrome <i>b</i> | <i>qrcB</i>   | 2.03       | 5.60E-03 |
| GOX0570                                                 | Hypothetical protein                                              |               | 3.51       | 2.57E-02 |
| GOX0576                                                 | Hypothetical protein                                              |               | 2.31       | 1.36E-02 |
| GOX0635                                                 | Hypothetical protein                                              |               | 2.53       | 2.06E-02 |
| GOX0646                                                 | Putative oxidoreductase                                           |               | 2.37       | 2.12E-02 |
| GOX0647                                                 | Putative exporter protein, ArAE family                            | <i>fusB</i>   | 2.96       | 2.43E-02 |
| GOX0673                                                 | Ferrous iron transport protein A                                  | <i>feoA</i>   | 4.40       | 2.14E-04 |
| GOX0674                                                 | Ferrous iron transport protein B                                  | <i>feoB</i>   | 2.51       | 1.03E-02 |
| GOX0679                                                 | Conserved protein of the SAM superfamily                          |               | 3.71       | 1.90E-02 |
| GOX0707                                                 | DNA starvation/stationary phase protection protein                | <i>dps</i>    | 3.46       | 1.33E-02 |
| GOX0726                                                 | Hypothetical protein                                              |               | 5.83       | 3.85E-02 |
| GOX0756                                                 | Alcohol dehydrogenase, 15 kDa subunit                             |               | 2.14       | 5.42E-02 |
| GOX0814                                                 | PTS system IIA component                                          | <i>ptsIIA</i> | 2.13       | 2.38E-03 |

|         |                                                      |             |       |          |
|---------|------------------------------------------------------|-------------|-------|----------|
| GOX0815 | Hypothetical protein                                 |             | 2.39  | 1.75E-02 |
| GOX0875 | AtsE protein                                         |             | 2.19  | 9.83E-03 |
| GOX0881 | Arylesterase                                         |             | 2.31  | 3.51E-03 |
| GOX0890 | Hypothetical protein                                 |             | 2.39  | 2.47E-02 |
| GOX0915 | Hypothetical protein                                 |             | 2.28  | 1.34E-04 |
| GOX1050 | dTDP-4-dehydrorhamnose reductase                     |             | 2.24  | 9.65E-04 |
| GOX1051 | dTDP-4-dehydrorhamnose 3.5-epimerase                 |             | 2.62  | 4.93E-03 |
| GOX1052 | Glucose-1-phosphate thymidyltransferase, C-terminus  |             | 2.64  | 2.93E-03 |
| GOX1053 | dTDP-glucose 4,6-dehydratase                         |             | 2.32  | 4.02E-03 |
| GOX1068 | Alcohol dehydrogenase, large subunit                 |             | 2.19  | 5.43E-03 |
| GOX1107 | O-antigen biosynthesis protein RfbC                  | <i>rfbC</i> | 3.19  | 2.05E-03 |
| GOX1132 | Hypothetical protein                                 |             | 2.42  | 3.95E-04 |
| GOX1246 | TonB-dependent receptor protein                      |             | 3.56  | 6.79E-03 |
| GOX1276 | Secreted protein of amidohydrolase family            |             | 2.01  | 2.53E-02 |
| GOX1302 | Paraquat-inducible protein A                         |             | 2.43  | 1.10E-02 |
| GOX1303 | Paraquat-inducible protein B                         |             | 2.18  | 2.57E-02 |
| GOX1332 | Alkyl hydroperoxide reductase subunit C              |             | 2.20  | 9.98E-03 |
| GOX1357 | Putative electron transport protein                  |             | 2.63  | 1.81E-02 |
| GOX1385 | Hypothetical protein                                 |             | 2.01  | 1.11E-02 |
| GOX1457 | Hypothetical protein                                 |             | 2.11  | 3.65E-02 |
| GOX1458 | Putative oxidoreductase                              |             | 2.47  | 1.90E-02 |
| GOX1462 | Putative oxidoreductase                              |             | 3.88  | 3.47E-02 |
| GOX1463 | ATP-dependent Clp protease, ATP-binding subunit ClpV | <i>clpV</i> | 2.41  | 4.16E-02 |
| GOX1615 | Putative oxidoreductase                              |             | 4.34  | 2.11E-04 |
| GOX1636 | 5-Aminolevulinate synthase                           |             | 2.75  | 3.85E-02 |
| GOX1697 | Hypothetical protein                                 |             | 2.17  | 1.12E-02 |
| GOX1698 | Aminopeptidase                                       |             | 2.33  | 4.39E-03 |
| GOX1712 | Aldehyde dehydrogenase                               |             | 2.90  | 4.34E-02 |
| GOX1748 | Bacterioferritin                                     | <i>bfr</i>  | 4.90  | 2.82E-02 |
| GOX1774 | Putative ATP-sensitive potassium channel protein     |             | 3.17  | 6.71E-03 |
| GOX1800 | Superoxide dismutase                                 | <i>sod</i>  | 2.00  | 1.92E-02 |
| GOX1801 | Putative oxidoreductase                              |             | 2.38  | 3.63E-02 |
| GOX1840 | Hypothetical protein                                 |             | 5.16  | 4.51E-02 |
| GOX1841 | Hypothetical protein                                 |             | 14.16 | 7.46E-04 |
| GOX1877 | Glutathione peroxidase                               |             | 2.06  | 1.57E-02 |
| GOX1895 | Hypothetical protein                                 |             | 2.00  | 1.04E-06 |
| GOX1896 | Coproporphyrinogen III oxidase                       |             | 2.73  | 5.19E-02 |
| GOX1899 | Putative oxidoreductase                              |             | 2.02  | 1.18E-02 |
| GOX1900 | Putative carboxymethylenebutenolidase                |             | 2.54  | 6.95E-03 |
| GOX1951 | Hypothetical protein                                 |             | 3.28  | 6.87E-03 |
| GOX1953 | 5-Methylcytosine-specific restriction enzyme         |             | 4.05  | 2.70E-02 |
| GOX1992 | Osmotically inducible protein C, peroxyredoxin       | <i>osmC</i> | 4.90  | 1.37E-02 |
| GOX2019 | Putative esterase                                    |             | 2.11  | 1.17E-02 |
| GOX2066 | Glutaminase                                          | <i>gls</i>  | 2.62  | 3.06E-02 |
| GOX2069 | Transcriptional regulator, DeoR family               |             | 2.52  | 7.54E-03 |
| GOX2083 | Hypothetical protein                                 |             | 2.40  | 1.72E-02 |
| GOX2096 | Major polyol dehydrogenase, large subunit            | <i>sldA</i> | 2.53  | 1.36E-02 |

|                                                           |                                                              |              |      |          |
|-----------------------------------------------------------|--------------------------------------------------------------|--------------|------|----------|
| GOX2097                                                   | Major polyol dehydrogenase small subunit                     | <i>sldB</i>  | 2.70 | 7.42E-05 |
| GOX2108                                                   | NADH-dependent iron-containing alcohol dehydrogenase         |              | 2.15 | 6.69E-03 |
| GOX2152                                                   | Hypothetical protein                                         |              | 3.12 | 1.77E-03 |
| GOX2153                                                   | Hypothetical protein                                         |              | 2.97 | 9.32E-04 |
| GOX2168                                                   | F <sub>1</sub> F <sub>0</sub> -ATP synthase subunit e        | <i>atpC</i>  | 2.11 | 8.67E-03 |
| GOX2170                                                   | F <sub>1</sub> F <sub>0</sub> -ATP synthase subunit r        | <i>atpR*</i> | 2.36 | 2.71E-02 |
| GOX2171                                                   | F <sub>1</sub> F <sub>0</sub> -ATP synthase subunit a        | <i>atpB</i>  | 2.52 | 2.06E-02 |
| GOX2172                                                   | F <sub>1</sub> F <sub>0</sub> -ATP synthase subunit c        | <i>atpE</i>  | 2.25 | 5.27E-02 |
| GOX2174                                                   | F <sub>1</sub> F <sub>0</sub> -ATP synthase subunit $\alpha$ | <i>atpA</i>  | 2.45 | 2.59E-02 |
| GOX2199                                                   | Probable myosin-crossreactive antigen                        |              | 4.46 | 6.39E-04 |
| GOX2200                                                   | Probable myosin-crossreactive antigen                        |              | 2.82 | 5.17E-02 |
| GOX2246                                                   | Hypothetical protein                                         |              | 2.89 | 2.71E-02 |
| GOX2253                                                   | Putative oxidoreductase                                      |              | 2.60 | 4.68E-03 |
| GOX2308                                                   | Delta-aminolevulinic acid dehydratase                        |              | 2.66 | 5.22E-03 |
| GOX2407                                                   | Putative RNA polymerase sigma factor E ( $\sigma^{24}$ )     |              | 2.32 | 5.02E-02 |
| GOX2410                                                   | ABC transporter involved in cytochrome <i>bd</i> biogenesis  | <i>cydC</i>  | 2.02 | 3.04E-02 |
| GOX2413                                                   | Hypothetical protein                                         |              | 2.20 | 1.69E-02 |
| GOX2470                                                   | Hypothetical protein                                         |              | 2.24 | 1.80E-03 |
| GOX2494                                                   | Hypothetical protein                                         |              | 2.33 | 2.39E-02 |
| GOX2683                                                   | Hypothetical protein                                         |              | 2.71 | 3.22E-02 |
| GOX2684                                                   | NAD(P)H-dependent 2-cyclohexen-1-one reductase               |              | 2.10 | 6.24E-03 |
| GOX2698                                                   | Hypothetical protein                                         |              | 2.30 | 1.23E-03 |
| GOX2699                                                   | Hypothetical protein                                         |              | 2.89 | 1.78E-04 |
| <b>208 genes with an mRNA ratio <math>\leq 0.5</math></b> |                                                              |              |      |          |
| GOX0035                                                   | Hypothetical protein                                         |              | 0.39 | 4.60E-03 |
| GOX0036                                                   | Enoyl-acyl-carrier-protein reductase                         | <i>fabL</i>  | 0.48 | 2.41E-02 |
| GOX0053                                                   | Hypothetical protein                                         |              | 0.24 | 2.10E-02 |
| GOX0066                                                   | Competence protein ComM                                      |              | 0.35 | 2.27E-02 |
| GOX0074                                                   | Elongation factor Ts                                         | <i>tsf</i>   | 0.40 | 3.11E-03 |
| GOX0075                                                   | Ribosomal protein S2                                         |              | 0.34 | 4.92E-03 |
| GOX0088                                                   | Trigger factor                                               |              | 0.44 | 3.84E-04 |
| GOX0103                                                   | Carboxypeptidase-related protein                             |              | 0.49 | 8.83E-03 |
| GOX0116                                                   | Fatty acid/phospholipid synthesis protein                    |              | 0.48 | 9.45E-03 |
| GOX0126                                                   | Flagellar motor protein MotA                                 | <i>motA</i>  | 0.41 | 3.37E-02 |
| GOX0127                                                   | Chemotaxis MotB protein                                      |              | 0.13 | 3.39E-02 |
| GOX0140                                                   | Ribosomal protein L27                                        |              | 0.38 | 1.16E-03 |
| GOX0160                                                   | UDP-N-acetylenolpyruvoylglucosamine reductase                |              | 0.46 | 1.95E-02 |
| GOX0193                                                   | Isopropylmalate isomerase, large subunit                     |              | 0.30 | 4.74E-03 |
| GOX0194                                                   | Ribosomal protein L19                                        | <i>rplS</i>  | 0.38 | 6.37E-03 |
| GOX0195                                                   | tRNA (Guanine-N(1)-)-methyltransferase                       |              | 0.40 | 3.25E-03 |
| GOX0196                                                   | Ribosomal protein S16                                        | <i>rpsP</i>  | 0.35 | 6.27E-03 |
| GOX0197                                                   | Signal recognition particle protein                          | <i>ffh</i>   | 0.38 | 7.30E-03 |
| GOX0246                                                   | Hypothetical protein                                         |              | 0.15 | 1.79E-02 |
| GOX0247                                                   | Hypothetical protein                                         |              | 0.47 | 3.35E-02 |
| GOX0248                                                   | Hypothetical protein                                         |              | 0.44 | 8.34E-03 |
| GOX0254                                                   | Putative Fe-S-cluster redox enzyme                           |              | 0.38 | 6.64E-03 |

|         |                                          |             |      |          |
|---------|------------------------------------------|-------------|------|----------|
| GOX0272 | Hypothetical protein                     |             | 0.36 | 2.50E-02 |
| GOX0305 | Ribosomal protein S18                    |             | 0.42 | 1.28E-02 |
| GOX0306 | Ribosomal protein S6                     |             | 0.36 | 5.90E-04 |
| GOX0348 | HlyD family secretion protein            |             | 0.48 | 4.34E-02 |
| GOX0359 | Adenylate kinase                         | <i>adk</i>  | 0.36 | 7.95E-03 |
| GOX0360 | Preprotein translocase subunit SecY      | <i>secY</i> | 0.37 | 2.13E-03 |
| GOX0361 | Ribosomal protein L15                    |             | 0.33 | 3.13E-03 |
| GOX0362 | Ribosomal protein L30                    |             | 0.29 | 7.76E-03 |
| GOX0363 | Ribosomal protein S5                     |             | 0.29 | 3.66E-05 |
| GOX0364 | Ribosomal protein L18                    |             | 0.23 | 8.89E-03 |
| GOX0365 | Ribosomal protein L6                     |             | 0.31 | 1.63E-03 |
| GOX0366 | Ribosomal protein S8                     |             | 0.31 | 6.46E-03 |
| GOX0367 | Ribosomal protein S14                    |             | 0.37 | 9.81E-04 |
| GOX0368 | Ribosomal protein L5                     |             | 0.24 | 1.00E-02 |
| GOX0369 | Ribosomal protein L24                    |             | 0.22 | 3.05E-03 |
| GOX0370 | Ribosomal protein L14                    |             | 0.22 | 6.73E-03 |
| GOX0371 | Ribosomal protein S17                    |             | 0.31 | 9.17E-03 |
| GOX0372 | Ribosomal protein L29                    |             | 0.32 | 3.24E-03 |
| GOX0373 | Ribosomal protein L16                    |             | 0.26 | 6.00E-03 |
| GOX0374 | Ribosomal protein S3                     |             | 0.39 | 5.13E-04 |
| GOX0375 | Ribosomal protein L22                    |             | 0.37 | 4.80E-04 |
| GOX0376 | Ribosomal protein S19                    |             | 0.34 | 2.97E-17 |
| GOX0377 | Ribosomal protein L2                     |             | 0.40 | 3.77E-03 |
| GOX0378 | Ribosomal protein L23                    |             | 0.40 | 6.36E-03 |
| GOX0379 | Ribosomal protein L4                     |             | 0.42 | 2.00E-04 |
| GOX0380 | Ribosomal protein L3                     |             | 0.40 | 9.82E-03 |
| GOX0381 | Ribosomal protein S10                    |             | 0.34 | 2.79E-02 |
| GOX0382 | Elongation factor Tu                     | <i>tuf</i>  | 0.45 | 1.31E-02 |
| GOX0383 | Ribosomal protein S7                     |             | 0.37 | 1.12E-03 |
| GOX0384 | Ribosomal protein S12                    |             | 0.37 | 5.08E-03 |
| GOX0385 | RNA polymerase. subunit b'               | <i>rpoC</i> | 0.46 | 2.14E-02 |
| GOX0387 | Ribosomal protein L7/L12                 |             | 0.31 | 7.17E-04 |
| GOX0388 | Ribosomal protein L10                    |             | 0.33 | 5.98E-03 |
| GOX0389 | Ribosomal protein L1                     |             | 0.29 | 1.46E-02 |
| GOX0390 | Ribosomal protein L11                    |             | 0.37 | 3.38E-04 |
| GOX0403 | Hypothetical protein                     |             | 0.49 | 5.66E-03 |
| GOX0405 | TonB-dependent outer membrane receptor   |             | 0.11 | 5.77E-03 |
| GOX0415 | Putative transport protein               |             | 0.49 | 2.44E-02 |
| GOX0420 | Flagellar biosynthesis protein A         |             | 0.18 | 2.25E-03 |
| GOX0421 | Flagellar motor switch protein           |             | 0.05 | 5.14E-03 |
| GOX0422 | Hypothetical protein                     |             | 0.06 | 7.08E-05 |
| GOX0423 | Flagellar motor switch protein G         |             | 0.07 | 2.79E-03 |
| GOX0424 | Flagellar MS-ring protein                |             | 0.05 | 5.29E-03 |
| GOX0425 | Basal-body rod modification protein FlgD | <i>flgD</i> | 0.14 | 2.36E-02 |
| GOX0426 | Hypothetical protein                     |             | 0.10 | 2.44E-02 |
| GOX0451 | Ribosomal protein S9                     |             | 0.34 | 3.38E-03 |
| GOX0452 | Ribosomal protein L13                    |             | 0.38 | 2.59E-02 |

|         |                                                                |             |      |          |
|---------|----------------------------------------------------------------|-------------|------|----------|
| GOX0515 | Hypothetical protein                                           |             | 0.42 | 6.22E-03 |
| GOX0560 | Diguanylate cyclase                                            |             | 0.39 | 3.61E-02 |
| GOX0596 | Ribosomal protein S1                                           |             | 0.34 | 1.32E-02 |
| GOX0619 | Hypothetical protein                                           |             | 0.34 | 2.95E-02 |
| GOX0620 | Chemotactic signal-response protein CheL                       | <i>cheL</i> | 0.24 | 1.81E-02 |
| GOX0621 | Flagellar basal body P-ring protein                            |             | 0.30 | 4.35E-02 |
| GOX0693 | Hypothetical protein                                           |             | 0.24 | 3.66E-02 |
| GOX0694 | Hypothetical protein                                           |             | 0.15 | 2.47E-02 |
| GOX0695 | Hypothetical protein                                           |             | 0.11 | 2.38E-02 |
| GOX0696 | Flagellar motor switch protein FliM                            |             | 0.12 | 1.95E-02 |
| GOX0697 | Flagellar FliL protein                                         | <i>fliL</i> | 0.15 | 2.16E-02 |
| GOX0699 | L-Asparagine permease                                          |             | 0.37 | 2.72E-02 |
| GOX0758 | Porin                                                          |             | 0.21 | 8.51E-03 |
| GOX0766 | Methyl-accepting chemotaxis protein                            |             | 0.28 | 1.19E-02 |
| GOX0772 | Transcriptional regulator                                      |             | 0.47 | 1.70E-02 |
| GOX0778 | Two component sensor histidine kinase                          |             | 0.42 | 1.49E-03 |
| GOX0787 | Flagellin B                                                    |             | 0.06 | 3.66E-03 |
| GOX0788 | Flagellin assembly protein                                     | <i>mviN</i> | 0.13 | 1.79E-02 |
| GOX0809 | L-Asparaginase II                                              |             | 0.38 | 2.97E-03 |
| GOX0825 | Hypothetical protein                                           |             | 0.24 | 3.51E-02 |
| GOX0835 | Adenine phosphoribosyltransferase                              |             | 0.49 | 1.79E-02 |
| GOX0873 | Levansucrase                                                   |             | 0.48 | 1.27E-02 |
| GOX0907 | TonB-dependent outer membrane receptor                         |             | 0.45 | 8.63E-03 |
| GOX0909 | Thiol:disulfide interchange protein DsbD                       | <i>dsbD</i> | 0.48 | 8.45E-03 |
| GOX0926 | Sulfate adenylyltransferase subunit 1 / adenylylsulfate kinase |             | 0.36 | 7.12E-03 |
| GOX0927 | Sulfate adenylyltransferase subunit 2                          |             | 0.35 | 1.85E-03 |
| GOX0928 | Phosphoadenosine phosphosulfate reductase                      |             | 0.28 | 4.45E-03 |
| GOX0945 | TonB-dependent outer membrane receptor                         |             | 0.08 | 9.76E-03 |
| GOX0952 | Flagellar basal body P-ring biosynthesis protein FlgA          | <i>flgA</i> | 0.29 | 4.96E-02 |
| GOX0953 | Flagellar basal body rod protein FlgG                          | <i>flgG</i> | 0.09 | 1.40E-02 |
| GOX0954 | Flagellar basal-body rod protein FlgF                          | <i>flgF</i> | 0.11 | 2.11E-02 |
| GOX0960 | Protein with GGDEF and EAL domain                              |             | 0.41 | 2.82E-02 |
| GOX1003 | Septum formation associated protein (Maf-like protein)         |             | 0.48 | 1.46E-03 |
| GOX1017 | TonB-dependent outer membrane receptor                         |             | 0.17 | 4.55E-02 |
| GOX1025 | Flagellar hook-associated protein FlgL                         | <i>flgL</i> | 0.10 | 1.50E-02 |
| GOX1026 | Flagellar hook-associated protein 1 FlgK                       | <i>flgK</i> | 0.09 | 2.95E-02 |
| GOX1027 | Flagellar hook protein FlgE                                    | <i>flgE</i> | 0.07 | 1.23E-02 |
| GOX1091 | Spermidine synthase                                            |             | 0.50 | 4.35E-02 |
| GOX1114 | Vitamin B12-dependent ribonucleotide reductase                 |             | 0.31 | 1.22E-03 |
| GOX1141 | Ribosomal protein L25                                          |             | 0.35 | 5.81E-03 |
| GOX1142 | Peptidyl-tRNA hydrolase                                        |             | 0.42 | 1.33E-02 |
| GOX1197 | Hypothetical protein                                           |             | 0.43 | 2.59E-02 |
| GOX1198 | Sulfite reductase (ferredoxin)                                 |             | 0.34 | 1.31E-02 |
| GOX1199 | Putative oxidoreductase                                        |             | 0.46 | 9.24E-03 |
| GOX1208 | Hypothetical protein                                           |             | 0.48 | 1.12E-02 |
| GOX1209 | Hypothetical protein                                           |             | 0.14 | 5.36E-03 |

|         |                                                       |             |      |          |
|---------|-------------------------------------------------------|-------------|------|----------|
| GOX1210 | Hypothetical protein                                  |             | 0.24 | 8.67E-03 |
| GOX1211 | Phage DNA packaging protein                           |             | 0.22 | 1.10E-02 |
| GOX1212 | Phage portal protein                                  |             | 0.21 | 9.21E-03 |
| GOX1213 | Phage minor structural protein GP20                   |             | 0.24 | 1.52E-02 |
| GOX1214 | Hypothetical protein                                  |             | 0.21 | 9.48E-03 |
| GOX1215 | Hypothetical protein                                  |             | 0.21 | 6.90E-03 |
| GOX1216 | Hypothetical protein                                  |             | 0.20 | 9.86E-03 |
| GOX1217 | Hypothetical protein                                  |             | 0.22 | 1.19E-02 |
| GOX1218 | Phage tail sheath protein                             |             | 0.20 | 1.20E-02 |
| GOX1219 | Hypothetical protein                                  |             | 0.20 | 1.57E-02 |
| GOX1220 | Hypothetical protein                                  |             | 0.22 | 1.29E-02 |
| GOX1221 | Phage-recombinase-like protein                        |             | 0.20 | 1.67E-02 |
| GOX1222 | Hypothetical protein                                  |             | 0.24 | 1.82E-02 |
| GOX1223 | Hypothetical protein                                  |             | 0.25 | 2.02E-02 |
| GOX1224 | Phage-related baseplate assembly protein              |             | 0.28 | 1.30E-02 |
| GOX1225 | Putative phage tail protein                           |             | 0.20 | 1.35E-02 |
| GOX1226 | Hypothetical protein                                  |             | 0.24 | 6.60E-03 |
| GOX1227 | Hypothetical protein                                  |             | 0.25 | 1.50E-02 |
| GOX1228 | Hypothetical protein                                  |             | 0.24 | 1.90E-02 |
| GOX1229 | Hypothetical protein                                  |             | 0.26 | 2.30E-02 |
| GOX1231 | Gluconate 2-dehydrogenase subunit $\alpha$            | <i>gndB</i> | 0.50 | 3.23E-03 |
| GOX1237 | Acetylornithine aminotransferase                      |             | 0.47 | 5.34E-02 |
| GOX1264 | DNA processing chain A                                |             | 0.48 | 7.95E-03 |
| GOX1273 | Hypothetical protein                                  |             | 0.49 | 3.11E-02 |
| GOX1286 | Hypothetical protein                                  |             | 0.23 | 1.14E-03 |
| GOX1287 | Biopolymer transport ExbB protein                     |             | 0.32 | 7.75E-03 |
| GOX1288 | Biopolymer transport ExbD protein                     |             | 0.36 | 1.75E-02 |
| GOX1289 | Biopolymer transport ExbD protein                     |             | 0.42 | 1.11E-02 |
| GOX1291 | Flagellar basal body L-ring protein                   |             | 0.19 | 2.77E-02 |
| GOX1310 | F <sub>1</sub> F <sub>o</sub> -ATP synthase subunit d | <i>atpH</i> | 0.46 | 2.27E-03 |
| GOX1317 | Ile tRNA                                              |             | 0.31 | 8.31E-03 |
| GOX1416 | Porin B precursor                                     |             | 0.46 | 3.12E-02 |
| GOX1436 | Adenosine deaminase                                   | <i>tadA</i> | 0.49 | 1.43E-02 |
| GOX1455 | ATP-dependent RNA helicase                            |             | 0.42 | 1.98E-02 |
| GOX1523 | Flagellar biosynthetic protein FlhB                   | <i>flhB</i> | 0.29 | 4.47E-03 |
| GOX1524 | Flagellar biosynthetic protein FliR                   | <i>fliR</i> | 0.39 | 1.89E-02 |
| GOX1525 | Flagellar biosynthetic protein FliQ                   | <i>fliQ</i> | 0.06 | 1.98E-02 |
| GOX1526 | Flagellar hook-basal body protein FleE                | <i>fleE</i> | 0.06 | 2.66E-02 |
| GOX1527 | Flagellar basal body rod protein FlgC                 | <i>flgC</i> | 0.06 | 1.68E-02 |
| GOX1528 | Flagellar basal-body rod protein FlgB                 | <i>flgB</i> | 0.05 | 2.21E-02 |
| GOX1530 | Hypothetical protein                                  |             | 0.24 | 2.27E-02 |
| GOX1531 | Flagellar biosynthesis protein FliP                   | <i>fliP</i> | 0.46 | 4.98E-03 |
| GOX1543 | Hypothetical protein                                  |             | 0.42 | 7.74E-03 |
| GOX1549 | Methyl-accepting chemotaxis protein                   |             | 0.27 | 1.43E-02 |
| GOX1550 | Chemotaxis protein CheX                               | <i>cheX</i> | 0.27 | 2.08E-02 |
| GOX1551 | Chemotaxis protein CheY                               | <i>cheY</i> | 0.21 | 9.23E-03 |
| GOX1552 | Chemotaxis protein CheA                               | <i>cheA</i> | 0.20 | 1.40E-02 |

|         |                                                                                           |             |      |          |
|---------|-------------------------------------------------------------------------------------------|-------------|------|----------|
| GOX1553 | Chemotaxis protein CheW                                                                   | <i>cheW</i> | 0.31 | 6.48E-03 |
| GOX1554 | Chemotaxis protein CheR                                                                   | <i>cheR</i> | 0.22 | 6.77E-03 |
| GOX1579 | Hypothetical protein associated with <i>nus</i> operon                                    |             | 0.46 | 1.87E-03 |
| GOX1582 | Translation initiation factor IF-2                                                        |             | 0.48 | 3.45E-03 |
| GOX1585 | Ribosomal protein S15                                                                     |             | 0.49 | 3.06E-02 |
| GOX1586 | Polynucleotide phosphorylase/polyadenylase                                                |             | 0.46 | 4.24E-03 |
| GOX1587 | Putative 2-nitropropane dioxygenase                                                       |             | 0.36 | 1.32E-02 |
| GOX1613 | Protein with GGDEF and EAL domain                                                         |             | 0.13 | 2.65E-02 |
| GOX1632 | Hypothetical protein                                                                      |             | 0.15 | 6.36E-03 |
| GOX1642 | Carboxypeptidase-related protein                                                          |             | 0.49 | 1.81E-02 |
| GOX1661 | Bacterioferritin comigratory protein                                                      |             | 0.47 | 2.09E-02 |
| GOX1674 | Hypothetical protein                                                                      |             | 0.47 | 1.43E-02 |
| GOX1693 | Cell cycle transcriptional regulator CtrA                                                 | <i>ctrA</i> | 0.11 | 9.35E-03 |
| GOX1694 | Flagellum-specific ATP synthase                                                           |             | 0.26 | 1.63E-02 |
| GOX1695 | Hypothetical protein                                                                      |             | 0.42 | 8.87E-03 |
| GOX1699 | Hypothetical protein                                                                      |             | 0.24 | 7.45E-04 |
| GOX1737 | Rod shape-determining protein MreB                                                        |             | 0.39 | 4.63E-03 |
| GOX1780 | Ribosomal protein S4                                                                      | <i>rpsD</i> | 0.34 | 7.62E-03 |
| GOX1781 | Bacterial Peptide Chain Release Factor 3 (RF-3)                                           |             | 0.39 | 1.36E-02 |
| GOX1804 | Hypothetical protein                                                                      |             | 0.36 | 1.38E-03 |
| GOX1805 | Hypothetical protein                                                                      |             | 0.36 | 5.66E-03 |
| GOX1830 | Hypothetical protein                                                                      |             | 0.30 | 1.73E-02 |
| GOX1836 | N-formylmethionylaminoacyl-tRNA deformylase                                               |             | 0.48 | 8.43E-03 |
| GOX1857 | Uncharacterized PQQ-containing dehydrogenase 1                                            |             | 0.06 | 2.35E-03 |
| GOX1866 | PmbA protein                                                                              |             | 0.47 | 2.57E-02 |
| GOX1870 | Hypothetical protein                                                                      |             | 0.34 | 3.69E-02 |
| GOX1873 | DNA mismatch repair protein                                                               |             | 0.44 | 2.25E-02 |
| GOX1903 | TonB-dependent receptor protein                                                           |             | 0.09 | 7.96E-03 |
| GOX1911 | Cytochrome <i>bo</i> <sub>3</sub> ubiquinol oxidase subunit II                            | <i>cyoB</i> | 0.00 | 1.07E-03 |
| GOX1912 | Cytochrome <i>bo</i> <sub>3</sub> ubiquinol oxidase subunit I                             | <i>cyoA</i> | 0.00 | 8.68E-04 |
| GOX1913 | Cytochrome <i>bo</i> <sub>3</sub> ubiquinol oxidase subunit III                           | <i>cyoC</i> | 0.00 | 5.80E-04 |
| GOX1914 | Cytochrome <i>bo</i> <sub>3</sub> ubiquinol oxidase subunit IV                            | <i>cyoD</i> | 0.01 | 3.21E-04 |
| GOX1966 | Hypothetical protein                                                                      |             | 0.39 | 2.35E-03 |
| GOX2017 | Hypothetical protein                                                                      |             | 0.33 | 1.81E-03 |
| GOX2028 | Hypothetical protein                                                                      |             | 0.24 | 5.41E-03 |
| GOX2030 | Chaperone protein DnaK                                                                    | <i>dnaK</i> | 0.48 | 2.44E-03 |
| GOX2074 | 5-Methyltetrahydrofolate-S-homocysteine methyltransferase                                 |             | 0.49 | 3.09E-02 |
| GOX2130 | Hypothetical protein                                                                      |             | 0.38 | 2.79E-02 |
| GOX2132 | Hypothetical protein                                                                      |             | 0.28 | 1.16E-02 |
| GOX2133 | Hypothetical protein                                                                      |             | 0.24 | 2.84E-03 |
| GOX2205 | Hypothetical protein                                                                      |             | 0.18 | 1.32E-03 |
| GOX2206 | 5-methyltetrahydropteroyltriglutamate-homocysteine methyltransferase                      |             | 0.17 | 3.44E-03 |
| GOX2207 | Methylenetetrahydrofolate reductase                                                       |             | 0.29 | 6.54E-03 |
| GOX2249 | Aspartyl-tRNA synthetase                                                                  |             | 0.49 | 3.55E-02 |
| GOX2373 | Protein of Rieske non-heme iron oxygenase family, putative ring-hydroxylating dioxygenase |             | 0.14 | 1.98E-02 |

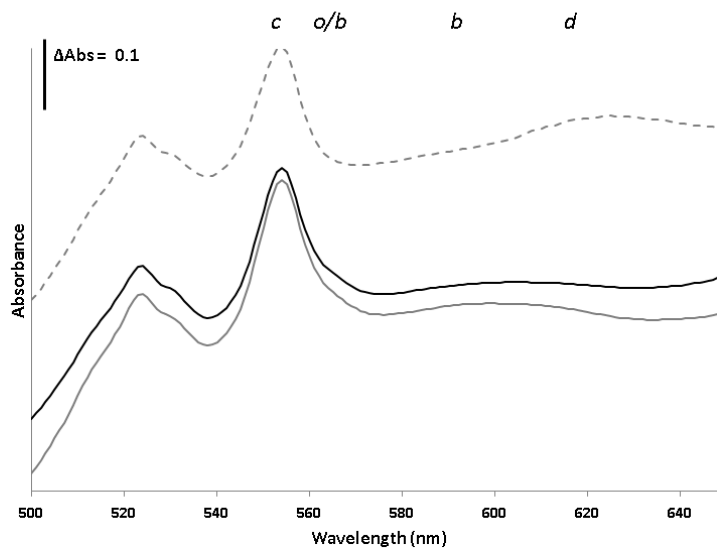

**FIG S1** Dithionite-reduced minus ferricyanide-oxidized difference spectra of purified membranes. Spectra were recorded at room temperature using  $10 \text{ mg ml}^{-1}$  membrane protein each. Black line, *G. oxydans*  $\Delta upp$ ; grey line, *G. oxydans*  $\Delta upp \Delta cydAB$ ; grey dashed line, *G. oxydans*  $\Delta upp \Delta cyoBACD$ . The experiments were conducted in triplicate; one exemplary curve for each strain is shown.

**Difference spectroscopy with isolated membranes.** For membrane isolation, cells were cultivated in 500 ml mannitol medium in a 2 l baffled shake flask at  $30^\circ\text{C}$  and 100 rpm in an Infors shaker (Basel, Switzerland). Cells were harvested after 16 h at an  $\text{OD}_{600}$  of 2-2.5 (*G. oxydans*  $\Delta upp \Delta cyoBACD$ ) or at an  $\text{OD}_{600}$  of 3.5-4 (*G. oxydans*  $\Delta upp$  and *G. oxydans*  $\Delta upp \Delta cydAB$ ) by centrifugation for 20 min at 6000 rpm (Beckman Avanti TM J25) and  $4^\circ\text{C}$ , washed with 25 ml 100 mM Tris-HCl, 20 mM  $\text{MgSO}_4$ , pH 7.5 and centrifuged for 5 min at  $10,414 \times g$  and  $4^\circ\text{C}$ . The cells were resuspended in 10 ml of 100 mM Tris-HCl with 20 mM  $\text{MgSO}_4$ , pH 7.5, and disrupted by five passages at 207 MPa through a French pressure cell (SLM Aminco). Cell debris was removed by centrifugation at  $16,100 \times g$  for 30 min at  $4^\circ\text{C}$ . The supernatant was used for ultracentrifugation at  $229,600 \times g$  and  $4^\circ\text{C}$  for 60 min. The



pellet containing the cytoplasmic membrane fraction was washed in 10 mM Tris-HCl, pH 7.5, and centrifuged again at  $229.600 \times g$  and  $4^{\circ}\text{C}$  for 60 min. The membranes were resuspended in a small volume of the same buffer. Protein concentration was determined according to Bradford (Bradford 1976 Anal. Biochem. 72: 248-254) using bovine serum albumin as standard.  $10 \text{ mg ml}^{-1}$  of membrane proteins were used for measurement of dithionite-reduced 'minus' ferricyanide-oxidized difference spectra. Recording was performed at room temperature with a Jasco V560 spectrophotometer using a special silicon photodiode detector as described (Niebisch and Bott 2001 Arch. Microbiol. 175: 282–294) and cuvettes with 5 mm lightpath. The instrument setting was  $40 \text{ nm min}^{-1}$  scanning velocity, 1 nm band width, and slow response. The reduced spectrum was recorded after addition of  $\text{Na}_2\text{S}_2\text{O}_4$ , the oxidized spectrum after addition of  $\text{K}_4[\text{Fe}(\text{CN})_6]$ .
